# Supplementary material
Source: PubMed Central journal article supplement (PMC8047681)
Supplement: i1537-2073-23-2-79_s01.pdf [file i1537-2073-23-2-79_s01.pdf]

**Table S1. Associations between upper limb dexterity, lower limb speed, EDSS score and the Multiple Sclerosis International Quality of Life questionnaire's dimensions (n = 52)**

| MusiQoL dimensions                   | ULs     | LLs     | EDSS    |
|--------------------------------------|---------|---------|---------|
| Global index                         | -.321*  | -.238   | -.267   |
| Activities of daily living           | -.557** | -.377** | -.506** |
| Psychological well-being             | -.355*  | -.227   | -.358** |
| Symptoms                             | -.360** | -.255   | -.315*  |
| Relationship with friends            | -.099   | .002    | -.133   |
| Relationship with family             | -.214   | -.160   | -.154   |
| Relationship with health care system | -.199   | -.133   | -.020   |
| Sentimental and sexual life          | -.156   | -.226   | -.186   |
| Coping                               | -.078   | .057    | -.123   |
| Rejection                            | -.190   | -.279*  | -.032   |

Abbreviations: MusiQoL: Multiple Sclerosis International Quality of Life questionnaire, ULs: upper limb dexterity (NHPT raw score), LLs: lower limb speed (T25FW raw score), EDSS: Expanded Disability Status Scale.

\* Statistically significant correlation with type 1 error set at 0.05 (bilateral).

\*\* Statistically significant correlation with type 1 error set at 0.01 (bilateral).
